# Supplementary material
Source: PubMed Central journal article supplement (PMC1150855)
Supplement: pnas_0503392102_2.pdf [file pnas_0503392102_2.pdf]

**Table 4. Primer sequences for T-DNA insertion lines.**

| Locus                                                   | Insertion line                | Direction | Primer sequence                           |
|---------------------------------------------------------|-------------------------------|-----------|-------------------------------------------|
| <b>Genomic PCRs for insertion lines</b>                 |                               |           |                                           |
| Insertion primer for SALK lines                         |                               |           | 5'-CGCCCTGATAGACGGTTTTTC-3'               |
| Insertion primer for SAIL lines                         |                               |           | 5'-TAGCATCTGAATTTTCATAACCAATCTCGATACAC-3' |
| At3g16920                                               | SALK_055713                   | For       | 5'-CTTCTTCTCGTCCAACACCTATCAG-3'           |
|                                                         |                               | Rev       | 5' GAAAAGCAACTCTTCTCCTACCACC-3'           |
|                                                         | SAIL_545_A07                  | For       | 5'- AGGAGAAGAGTTGCTTTTCGTGAG-3'           |
|                                                         |                               | Rev       | 5'- TGCCACACATTCAATGTGCGC-3'              |
| At4g27435                                               | SALK_137109                   | For       | 5'-CCTCATTGCCTTTGGTTTAGCC-3'              |
|                                                         |                               | Rev       | 5'-TGATTGGTGTGATGGGATTCC-3'               |
|                                                         | SAIL_1186_A05                 | For       | 5'-TGCGTCCAAGATTGTCTCAG-3'                |
|                                                         |                               | Rev       | 5'-GCATTCACGAGAATAGCTCAAACC-3'            |
| At5g03170                                               | SALK_046976                   | For       | 5'-ACAGAGAAGAAGAAGCAGCAATGG-3'            |
|                                                         |                               | Rev       | 5'-CAATCCTCACCCACCCAAACTC-3'              |
| At5g54690                                               | SALK_014026                   | For       | 5'-CGACCAGCTCTGGATTTATTCAC-3'             |
|                                                         |                               | Rev       | 5'-GTCTTGTAACCACCAAACAGCTCC-3'            |
|                                                         | SAIL_603_G02                  | For       | 5'-GAGAGGAGCAAGGAGAGGGAT-3'               |
|                                                         |                               | Rev       | 5'-TTTTGCATTGCCTTTGACTTG-3'               |
| <b>Confirmation of transcript deletion using RT-PCR</b> |                               |           |                                           |
| At3g16920                                               | SALK_055713/<br>SAIL_545_A07  | For       | 5'-AACCAAGCTTATGAAACCGCTATTCTCCC-3'       |
|                                                         |                               | Rev       | 5'-ACTTCCATGGAAGAAGAGGAACCAGAACTCG-3'     |
| At4g27435                                               | SALK_137109/<br>SAIL_1186_A05 | For       | 5'-AGCCAATCTAAGCAAACAGAGTCG-3'            |
|                                                         |                               | Rev       | 5'-TCCGCTATCAAGAAGAACATCCAG-3'            |
| At5g03170                                               | SALK_046976                   | For       | 5'-AGGTCCAACGAACATAACCGC-3'               |
|                                                         |                               | Rev       | 5'-CAAACCCGAATCCAGTCCTCTC-3'              |
| At5g54690                                               | SALK_014026/<br>SAIL_603_G02  | For       | 5'-CATCCATCTCCTTTCAGAC-3'                 |
|                                                         |                               | Rev       | 5'-TCATGATGCTCTAATGTGAC-3'                |

For, forward; Rev, reverse.
