# Supplementary material
Source: PubMed Central journal article supplement (PMC1150855)
Supplement: pnas_0503392102_7.pdf [file pnas_0503392102_7.pdf]

Table 5. Pathways coregulated with *CESA1*, 3, and 6 and *CESA4*, 7, and 8.

| Pathways coregulated with <i>CESA1</i> , 3, and 6.  |                  | Pathways coregulated with <i>CESA4</i> , 7, and 8.    |                  |
|-----------------------------------------------------|------------------|-------------------------------------------------------|------------------|
| Pathway name                                        | Congruence score | Pathway name                                          | Congruence score |
| Cellulose biosynthesis                              | 76.32            | Cellulose biosynthesis                                | 41.9             |
| Brassinosteroid biosynthesis                        | 19.12            | Homogalacturonan degradation                          | 37.292           |
| Homogalacturonan degradation                        | 15.73            | Flavonoid biosynthesis                                | 16.341           |
| Gluconeogenesis                                     | 8.933            | Suberin biosynthesis                                  | 14.271           |
| Aerobic glycerol catabolism                         | 8.442            | Lignin biosynthesis                                   | 13.774           |
| Glyceraldehyde 3-phosphate catabolism               | 8.366            | Lactose degradation 4                                 | 11.414           |
| Glycolysis                                          | 8.329            | Phytoalexin biosynthesis                              | 11.182           |
| Glycolysis 4                                        | 8.306            | Galactose, galactoside and glucose catabolism         | 11.033           |
| Fatty acid biosynthesis, initial steps              | 8.05             | Lactose degradation 3                                 | 10.68            |
| Lactose degradation 3                               | 6.804            | Lactose degradation 2                                 | 10.648           |
| Lactose degradation 2                               | 6.782            | Phenylpropanoid pathway, initial reactions            | 10.458           |
| Serine-isocitrate lyase pathway                     | 6.281            | Methionine biosynthesis from homoserine               | 9.847            |
| Galactose, galactoside and glucose catabolism       | 5.852            | Dtdp-rhamnose biosynthesis                            | 9.258            |
| Lactose degradation 4                               | 5.649            | Oxidative branch of the pentose phosphate pathway     | 8.973            |
| Lipases pathway                                     | 4.958            | Nucleotide metabolism                                 | 8.137            |
| Phytoalexin biosynthesis                            | 4.717            | Salicylic acid biosynthesis                           | 7.892            |
| Llignin biosynthesis                                | 3.562            | Gluconeogenesis                                       | 7.411            |
| Ethylene biosynthesis from methionine               | 3.385            | Glycolysis                                            | 7.36             |
| Sulfur assimilation                                 | 3.354            | Glycolysis 4                                          | 7.324            |
| Methionine biosynthesis from homoserine             | 3.317            | Arginine spermine degradation                         | 7.217            |
| Epicuticular wax biosynthesis                       | 2.856            | Ornithine spermine biosynthesis                       | 7.207            |
| Formation from methanol                             | 2.603            | Aerobic glycerol catabolism                           | 6.779            |
| Suberin biosynthesis                                | 2.446            | Glyceraldehyde 3-phosphate catabolism                 | 6.732            |
| Carbon monoxide dehydrogenase pathway               | 2.343            | Photorespiration                                      | 6.644            |
| Jasmonic acid biosynthesis                          | 2.28             | Triacylglycerol degradation                           | 5.591            |
| Lipoxygenase pathway                                | 2.145            | Serine-isocitrate lyase pathway                       | 5.465            |
| Flavonoid biosynthesis                              | 1.861            | Anthocyanin biosynthesis                              | 5.449            |
| Phytoalexin biosynthesis                            | 1.64             | Tma charging pathway                                  | 4.968            |
| Tryptophan biosynthesis                             | 1.543            | Ammonium assimilation                                 | 4.114            |
| Starch biosynthesis                                 | 1.533            | Brassinosteroid biosynthesis                          | 3.35             |
| Arginine spermine degradation                       | 1.529            | Biotin biosynthesis I                                 | 3.025            |
| Ornithine spermine biosynthesis                     | 1.527            | Biosynthesis of Arabidopsis flavonoids                | 3.019            |
| Carnitine metabolism, coa-linked                    | 1.479            | Glucosinolate biosynthesis from tryptophan            | 3.004            |
| Glutamate degradation I                             | 1.245            | Gibberellin biosynthesis                              | 2.762            |
| Calvin cycle                                        | 1.215            | Methionine degradation I                              | 2.679            |
| Biosynthesis of chlorophyll                         | 1.112            | Phosphatidic acid synthesis                           | 2.643            |
| Starch degradation                                  | -1.027           | Triacylglycerol biosynthesis                          | 2.639            |
| Lysine degradation I                                | -1.047           | Ethylene biosynthesis from methionine                 | 2.541            |
| Galactose metabolism                                | -1.15            | Nitrate assimilation pathway                          | 2.33             |
| Oxidative branch of the pentose phosphate pathway   | -1.191           | Sucrose degradation                                   | 2.145            |
| Sucrose biosynthesis                                | -1.269           | Phospholipid desaturation pathway                     | 1.891            |
| Nucleotide metabolism                               | -1.332           | Aspartate biosynthesis and degradation                | 1.766            |
| Protocatechuate ortho-cleavage                      | -1.353           | Mevalonate pathway                                    | 1.766            |
| Catechol 'ortho'-cleavage                           | -1.355           | Asparagine degradation I                              | 1.761            |
| Cyanate catabolism                                  | -1.409           | CO2 formation from methanol                           | 1.543            |
| Glutamine biosynthesis I                            | -1.438           | Carbon monoxide dehydrogenase pathway                 | 1.536            |
| Fatty acid oxidation pathway                        | -1.465           | Lysine degradation I                                  | 1.461            |
| Xylulose-monophosphate cycle                        | -1.507           | Lysine degradation III                                | 1.456            |
| Glyoxylate cycle                                    | -1.527           | Tryptophan degradation III                            | 1.451            |
| Pyrimidine ribonucleotide/ribonucleoside metabolism | -1.628           | Degradation of short-chain fatty acids                | 1.446            |
| Ammonium assimilation                               | -2.068           | Non-oxidative branch of the pentose phosphate pathway | 1.37             |
| Anthocyanin biosynthesis                            | -2.491           | Sucrose biosynthesis                                  | 1.252            |
| TCA cycle, aerobic respiration                      | -2.548           | Trehalose biosynthesis                                | 1.226            |
| Deoxyypyrimidine nucleotide/side metabolism         | -3.064           | Sinapoyl ester biosynthesis                           | 1.135            |
| Valine degradation I                                | -3.091           | Pyrimidine ribonucleotide/ribonucleoside metabolism   | 1.121            |
| Vitamin E biosynthesis                              | -3.281           | Cysteine biosynthesis I                               | -1.058           |
| Tyrosine degradation I                              | -3.44            | Xylulose-monophosphate cycle                          | -1.107           |
| L-serine degradation                                | -4.283           | Starch degradation                                    | -1.193           |
| Pantothenate and coenzyme A biosynthesis            | -8.064           | TCA cycle, aerobic respiration                        | -1.437           |
|                                                     |                  | Maltose catabolism                                    | -1.573           |
|                                                     |                  | Chorismate biosynthesis                               | -1.805           |
|                                                     |                  | Leucine biosynthesis                                  | -1.948           |
|                                                     |                  | Glutamate degradationviii                             | -2.175           |
|                                                     |                  | Arginine biosynthesis II                              | -2.18            |
|                                                     |                  | Tryptophan biosynthesis                               | -3.11            |
|                                                     |                  | Phenylalanine biosynthesis, Bacillus subtilis         | -4.471           |
|                                                     |                  | Tyrosine degradation I                                | -5.394           |
|                                                     |                  | Glycosylglyceride biosynthesis                        | -5.666           |
|                                                     |                  | Pyridoxal 5'-phosphate salvage pathway                | -6.305           |
|                                                     |                  | Auxin biosynthesis                                    | -8.122           |

Score indicates congruency (i.e., the extent of coexpression between *CESA1*, 3, and 6 or *CESA4*, 7, and 8 complexes and the genes in the specified pathway). The sign of the score indicates positive or negative coregulation. Pathways with scores <1 were excluded from the table.
