# Supplementary material
Source: PubMed Central journal article supplement (PMC1150855)
Supplement: pnas_0503392102_8.pdf [file pnas_0503392102_8.pdf]

**Table 6.** Pathway components that are coregulated with either *CESA1*, 3, and 6 or *CESA4*, 7, and 8

| Pathway                                                 | Congruence score |
|---------------------------------------------------------|------------------|
| <b>Pathways coregulated with <i>CESA1</i>, 3, and 6</b> |                  |
| Fatty acid biosynthesis, initial steps                  | 8.05             |
| Lipases pathway                                         | 4.96             |
| Epicuticular wax biosynthesis                           | 2.87             |
| Formation from methanol                                 | 2.60             |
| Valine degradation I                                    | -3.09            |
| Vitamin E biosynthesis                                  | -3.29            |
| L-serine degradation                                    | -4.28            |
| <b>Pathways coregulated with <i>CESA4</i>, 7, and 8</b> |                  |
| Photorespiration                                        | 6.64             |
| Biotin biosynthesis I                                   | 3.02             |
| Glucosinolate biosynthesis from tryptophan              | 3.00             |
| Gibberellin biosynthesis                                | 2.76             |
| Triacylglycerol biosynthesis                            | 2.64             |
| Glycosylglyceride biosynthesis                          | -5.67            |
| Pyridoxal 5'-phosphate salvage pathway                  | -6.31            |

Score indicates congruency (i.e., the extent of coexpression between *CESA1*, 3, and 6 or *CESA4*, 7, and 8 complexes and the genes in the specified pathway). The sign of the score indicates positive or negative coregulation. Pathways with scores <1 were excluded from the table.
