# Supplementary material
Source: PubMed Central journal article supplement (PMC1150855)

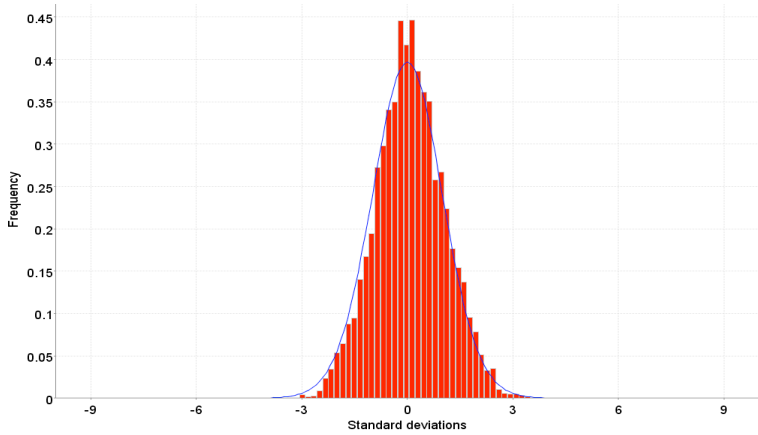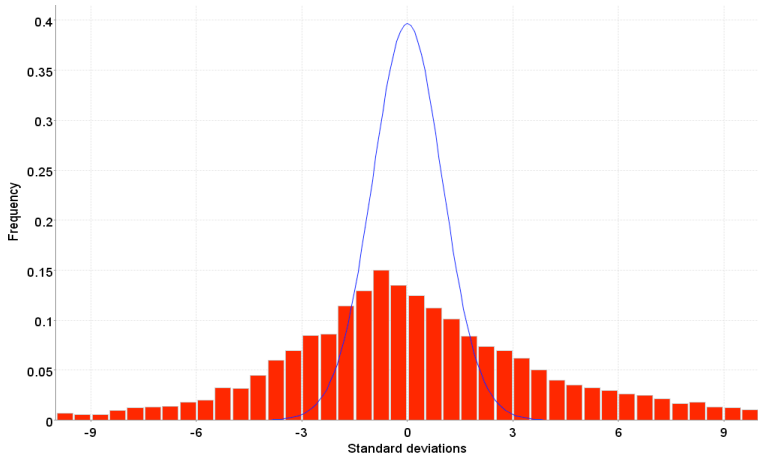

Supplement: pnas_0503392102_1.pdf [file pnas_0503392102_1.pdf]

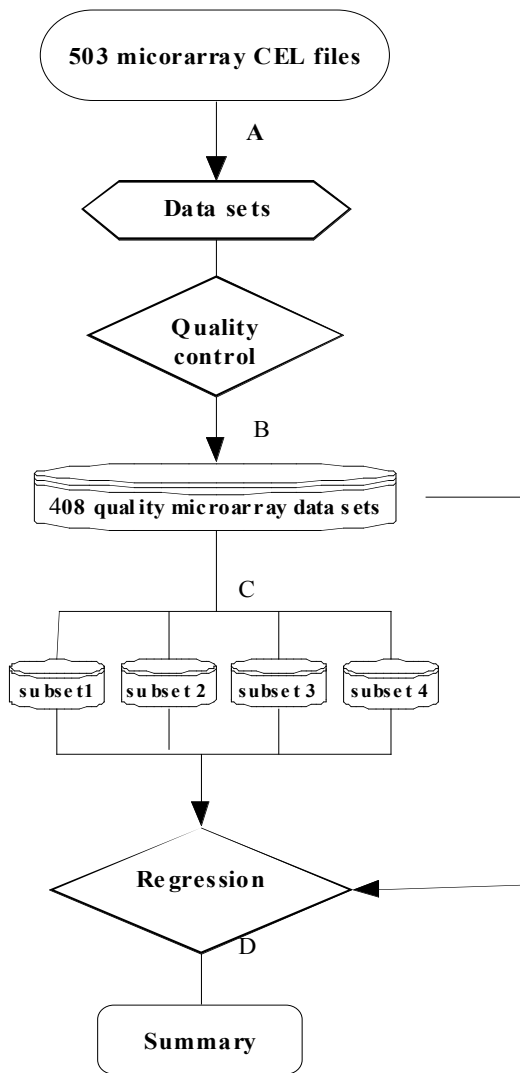

Supplement: pnas_0503392102_3.pdf [file pnas_0503392102_3.pdf]

**A**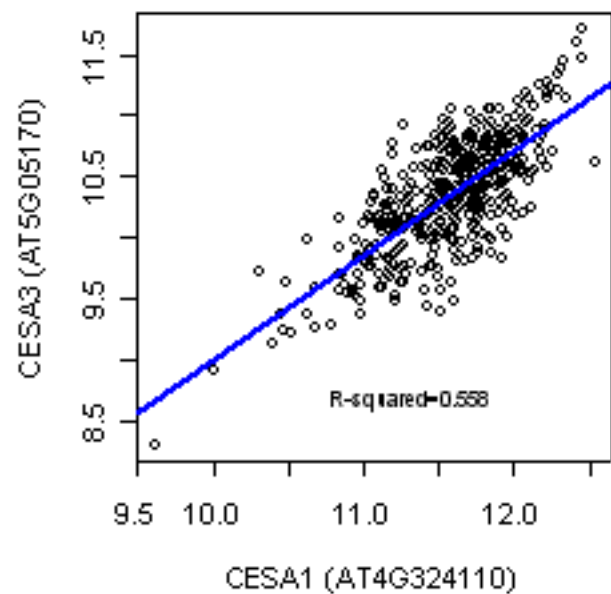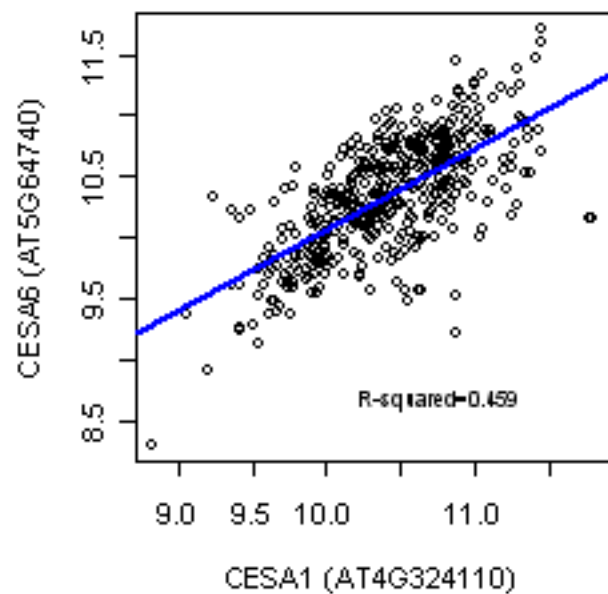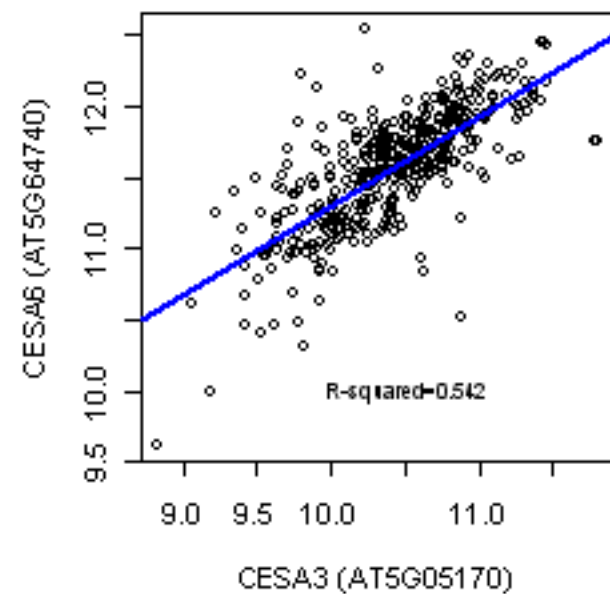**B**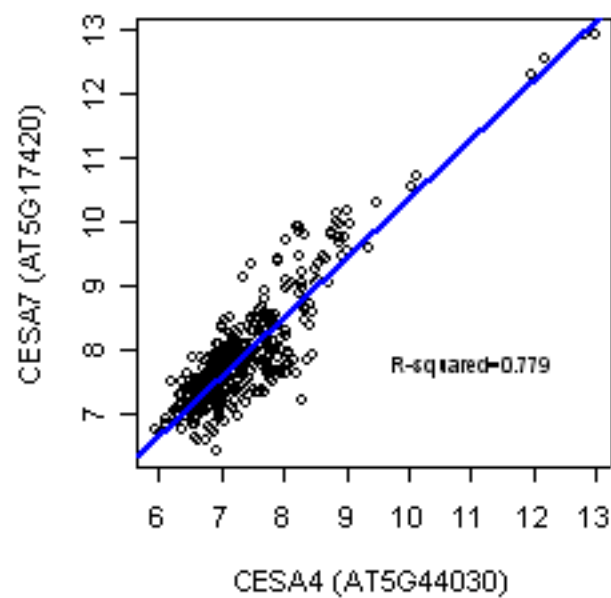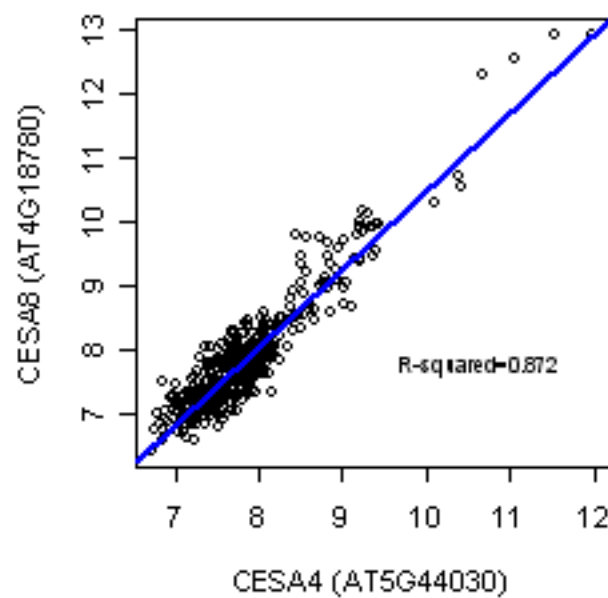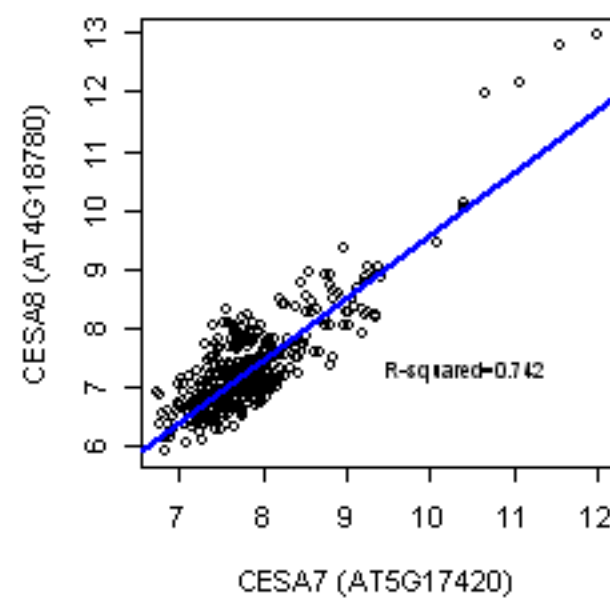

Supplement: pnas_0503392102_4.pdf [file pnas_0503392102_4.pdf]

**A**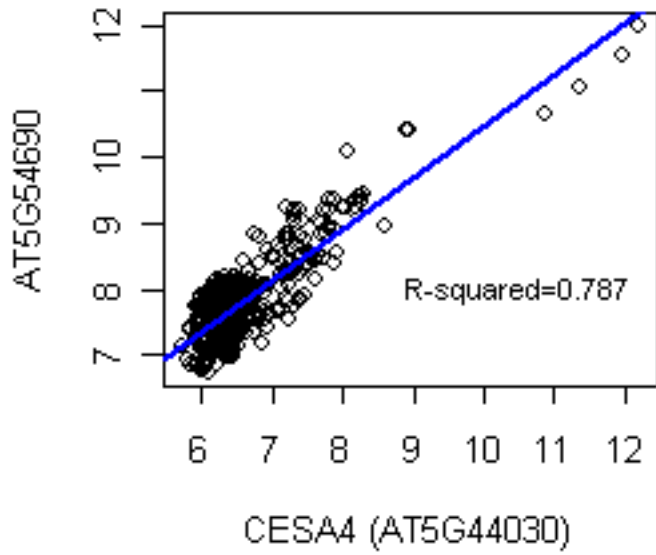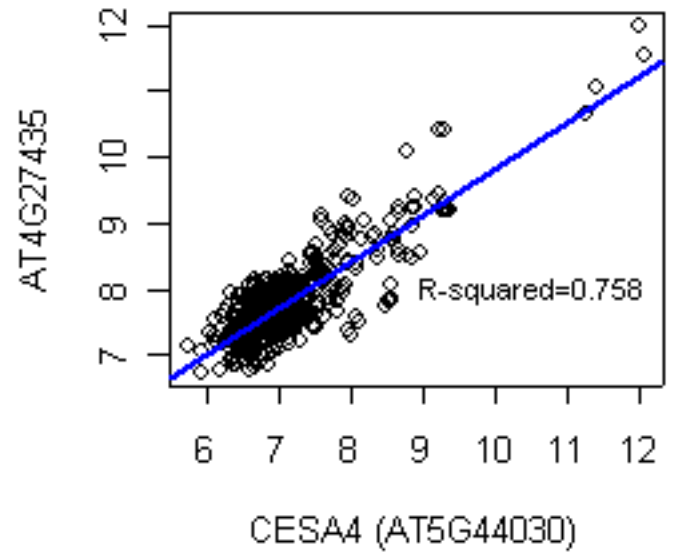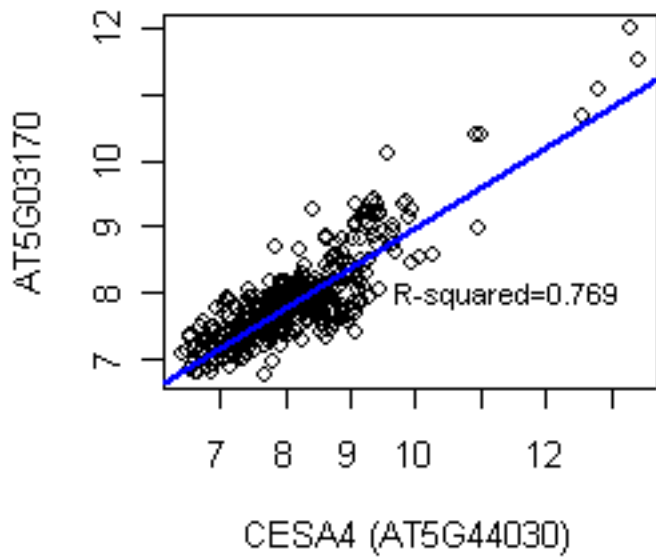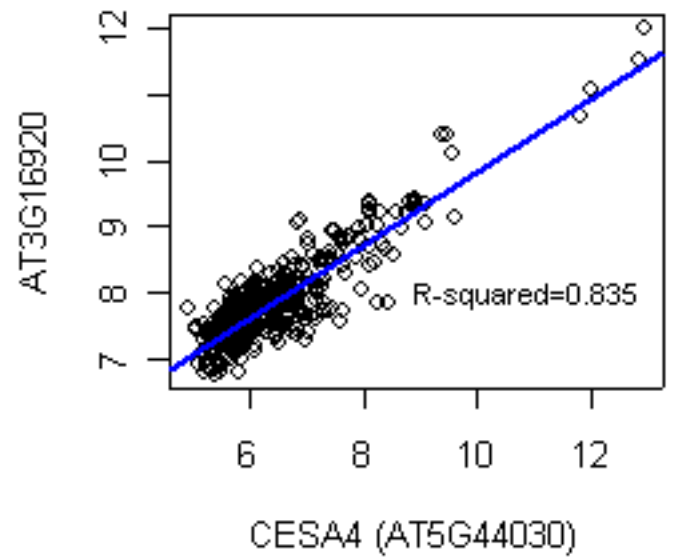**B**

| Locus/gene                | At5g54690 | At4g27436 | At5g03170 | At3g16920 |
|---------------------------|-----------|-----------|-----------|-----------|
| At5g44030( <i>CESA4</i> ) | 0,787     | 0,758     | 0,769     | 0,835     |
| At5g17420( <i>CESA7</i> ) | 0,800     | 0,667     | 0,773     | 0,724     |
| At4g18780( <i>CESA8</i> ) | 0,731     | 0,708     | 0,726     | 0,777     |

Supplement: pnas_0503392102_5.pdf [file pnas_0503392102_5.pdf]

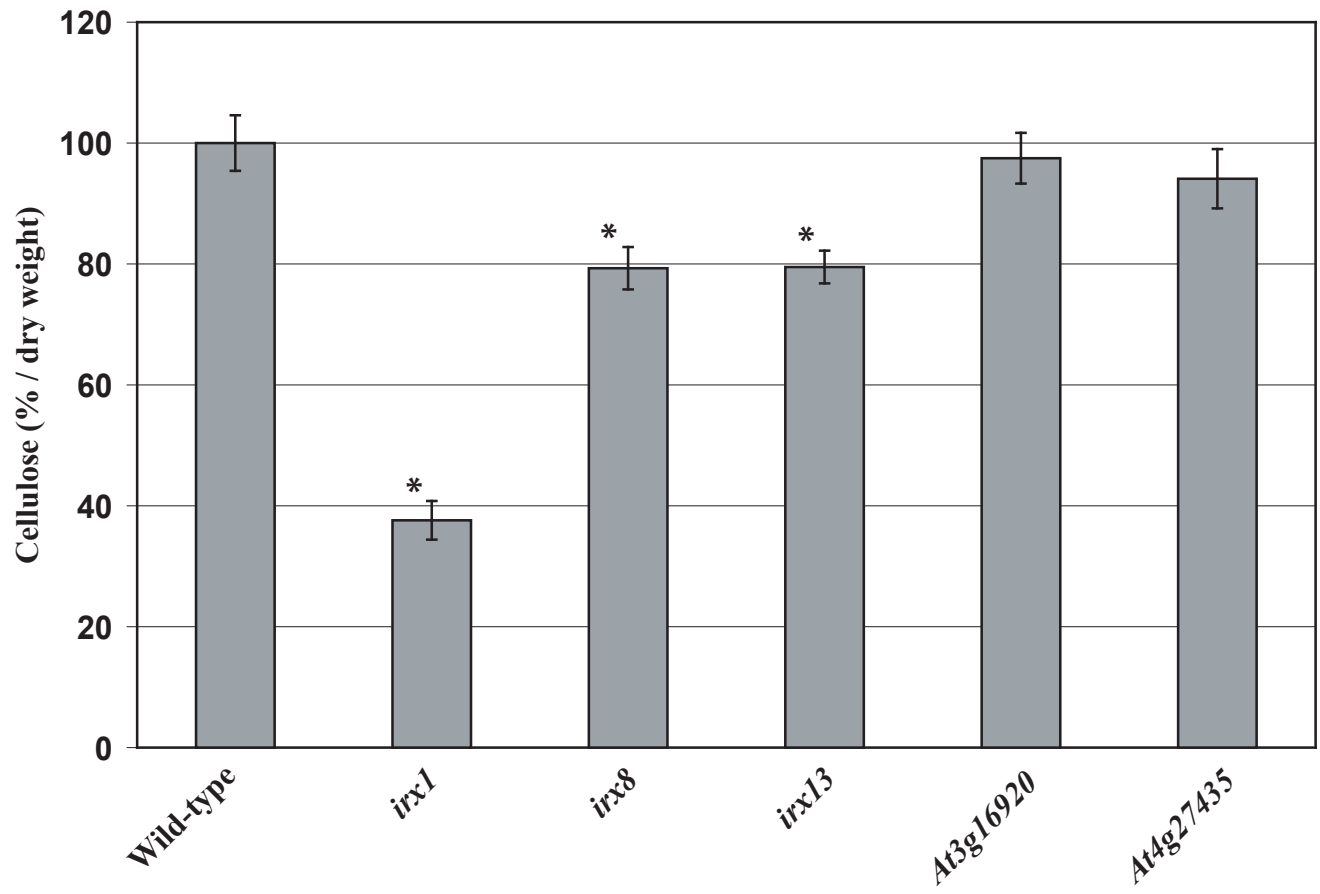

Supplement: pnas_0503392102_6.pdf [file pnas_0503392102_6.pdf]
